# Supplementary material for: Spontaneous neuronal oscillations in the human insula are hierarchically organized traveling waves
Source: eLife journal article supplement (doi:10.7554/elife.76702), 2022-05-26
Supplement: supp [file elife_poa_e76702_Figure_4_figure_supplement_1.pdf › elife_poa_e76702_Figure_4_figure_supplement_1.pdf]

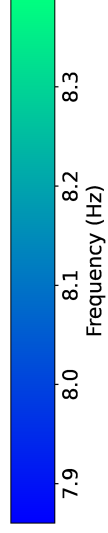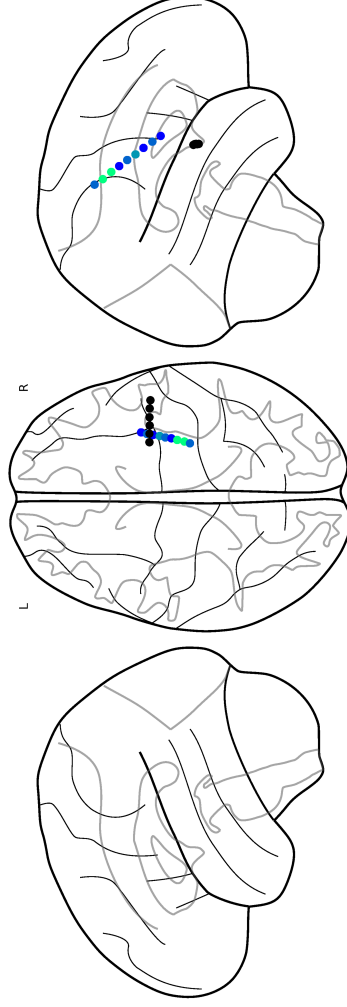

Subject # 1, cluster # 1, cluster frequency = 8.0 Hz, n = 9

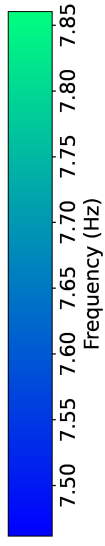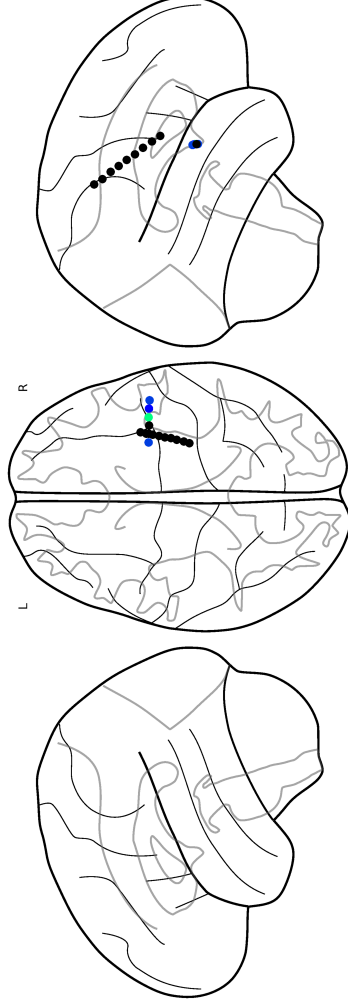

Subject # 1, cluster # 3, cluster frequency = 7.6 Hz, n = 4

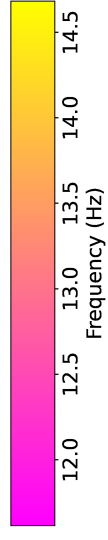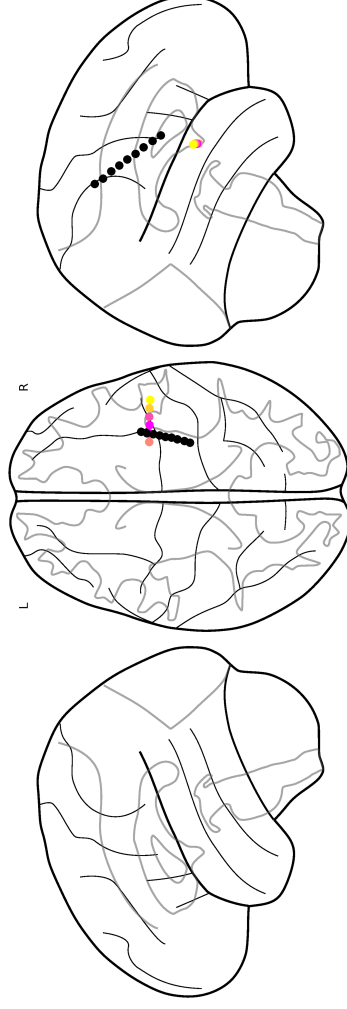

Subject # 1, cluster # 2, cluster frequency = 12.9 Hz, n = 6

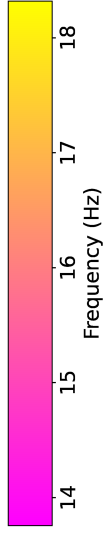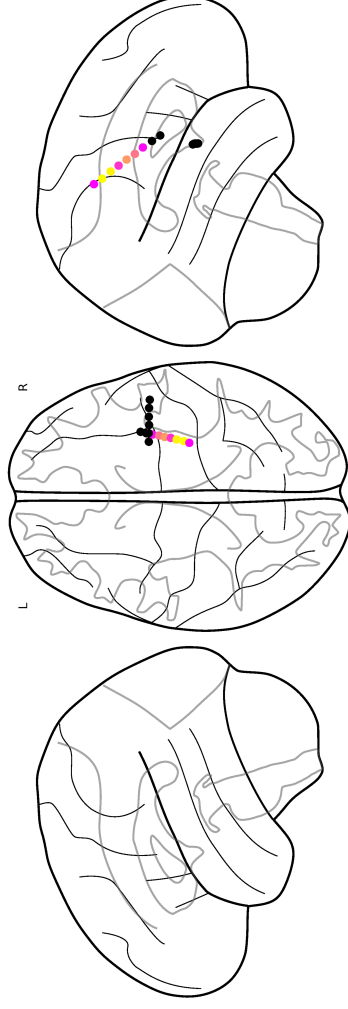

Subject # 1, cluster # 4, cluster frequency = 15.8 Hz, n = 7
