# Supplementary material for: Spontaneous neuronal oscillations in the human insula are hierarchically organized traveling waves
Source: eLife journal article supplement (doi:10.7554/elife.76702), 2022-05-26
Supplement: supp [file elife_poa_e76702_Figure_4_figure_supplement_2.pdf › elife_poa_e76702_Figure_4_figure_supplement_2.pdf]

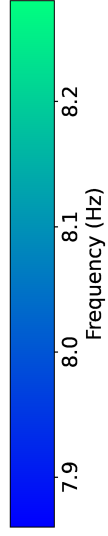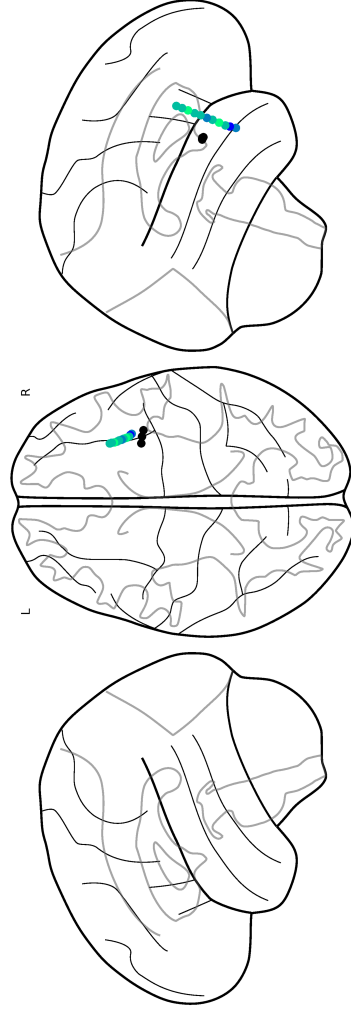

Subject # 2, cluster # 1, cluster frequency = 8.1 Hz,  $n = 11$

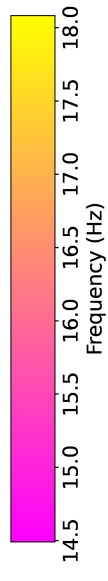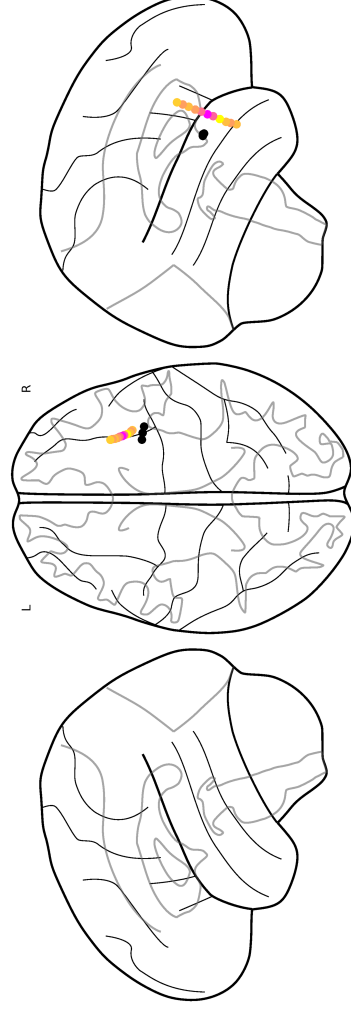

Subject # 2, cluster # 2, cluster frequency = 16.6 Hz,  $n = 11$

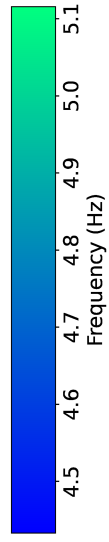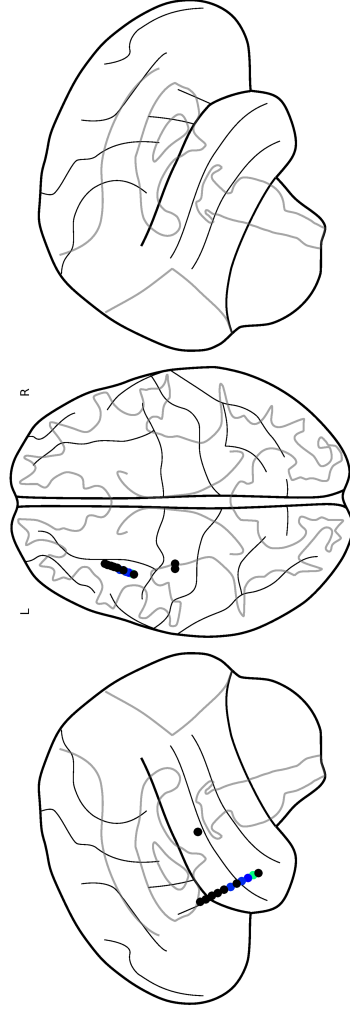

Subject # 2, cluster # 3, cluster frequency = 4.6 Hz,  $n = 4$
