# Supplementary material for: Spontaneous neuronal oscillations in the human insula are hierarchically organized traveling waves
Source: eLife journal article supplement (doi:10.7554/elife.76702), 2022-05-26
Supplement: supp [file elife_poa_e76702_Figure_4_figure_supplement_7.pdf › elife_poa_e76702_Figure_4_figure_supplement_7.pdf]

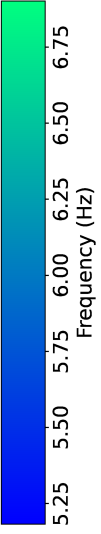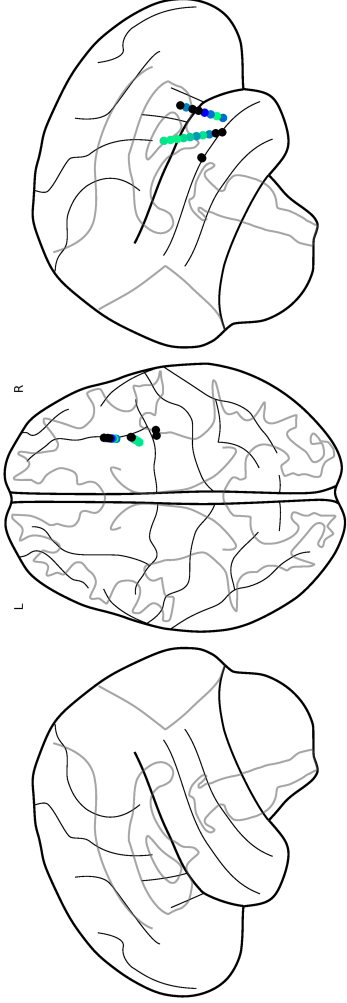

Subject # 8, cluster # 1, cluster frequency = 6.3 Hz, n = 13

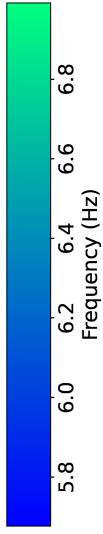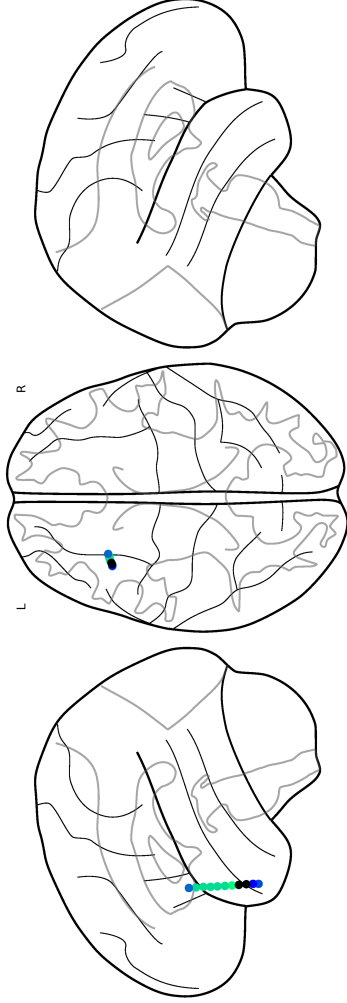

Subject # 8, cluster # 3, cluster frequency = 6.5 Hz, n = 9

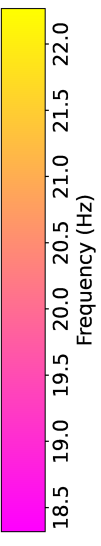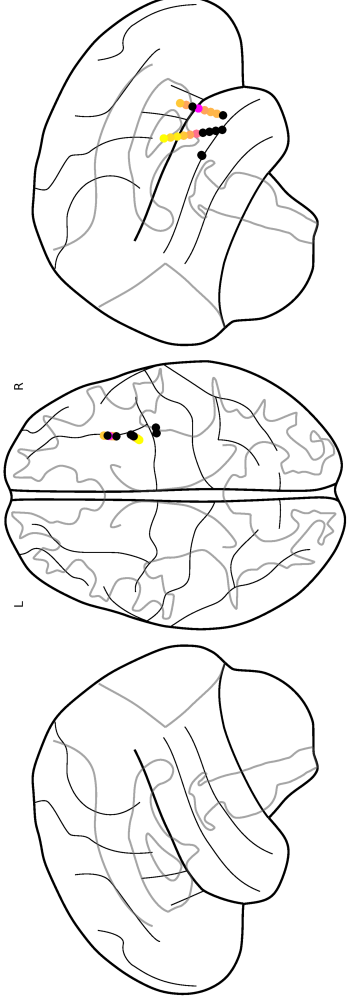

Subject # 8, cluster # 2, cluster frequency = 21.0 Hz, n = 12

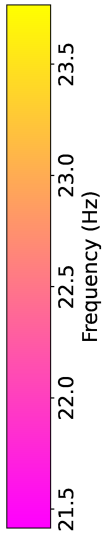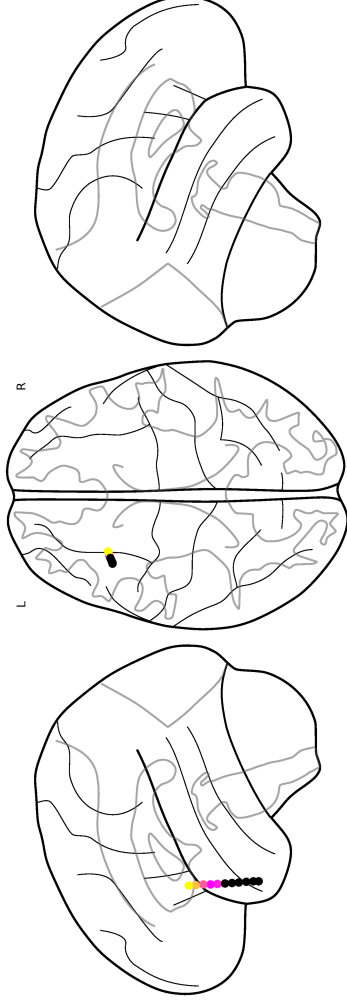

Subject # 8, cluster # 4, cluster frequency = 22.4 Hz, n = 5
