# Supplementary figures and images for: Spontaneous neuronal oscillations in the human insula are hierarchically organized traveling waves
Source: eLife journal article supplement (doi:10.7554/elife.76702), 2022-05-26

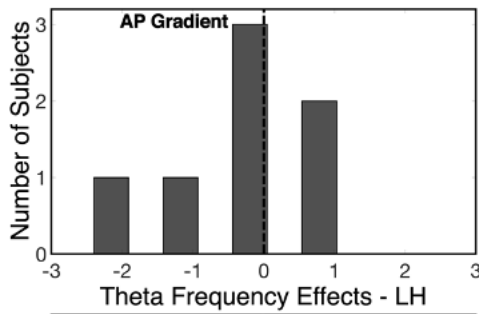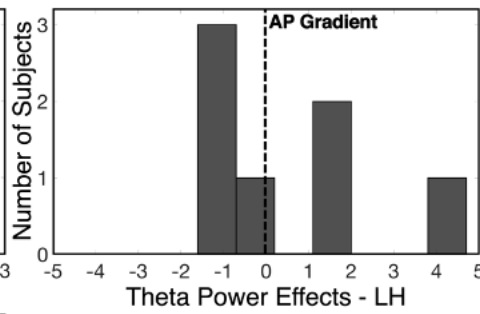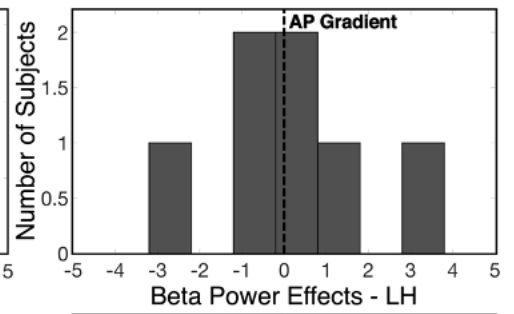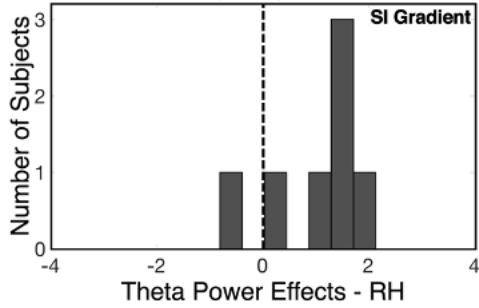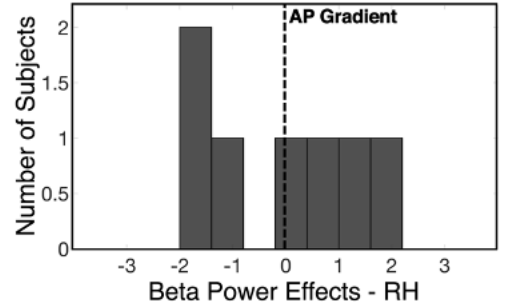

Supplement: supp [file elife_poa_e76702_Figure_1_figure_supplement_1.pdf › elife_poa_e76702_Figure_1_figure_supplement_1.pdf]

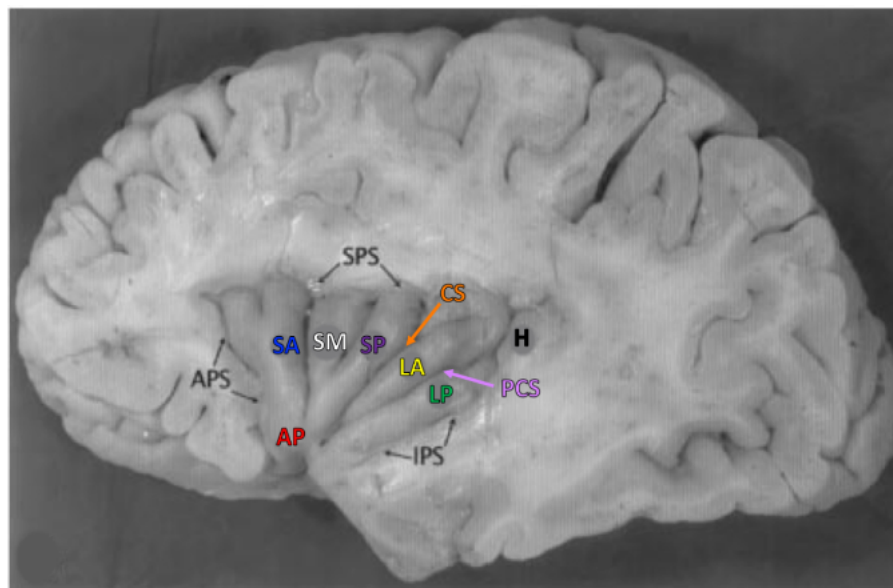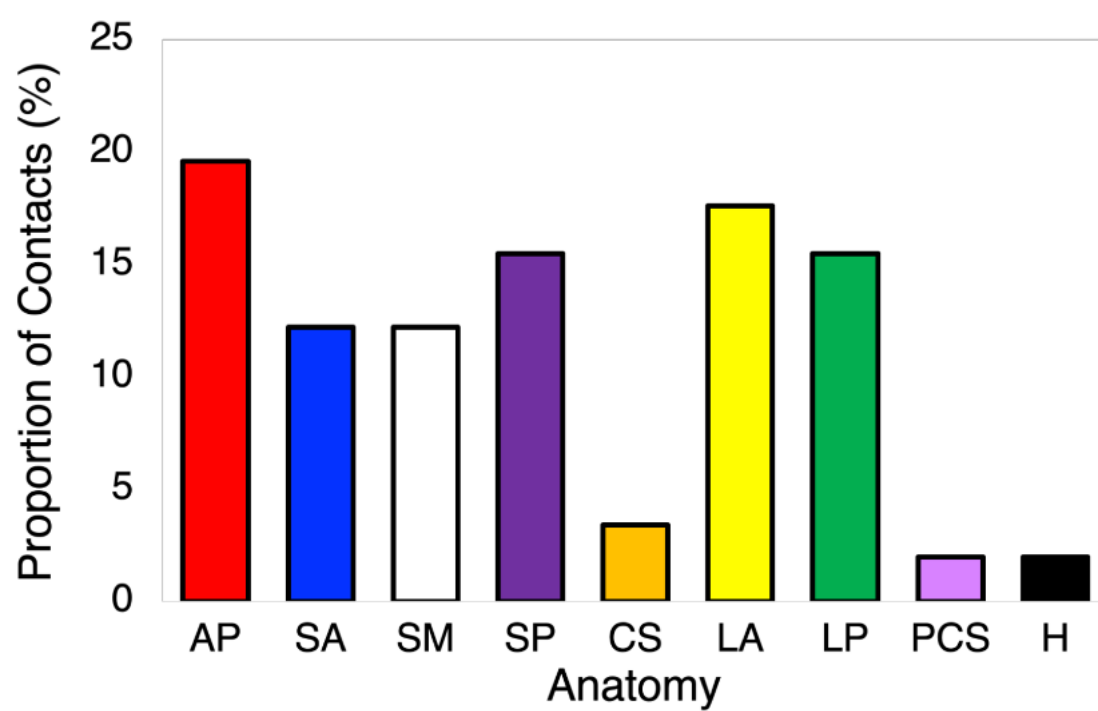

Supplement: supp [file elife_poa_e76702_Figure_1_figure_supplement_2.pdf › elife_poa_e76702_Figure_1_figure_supplement_2.pdf]

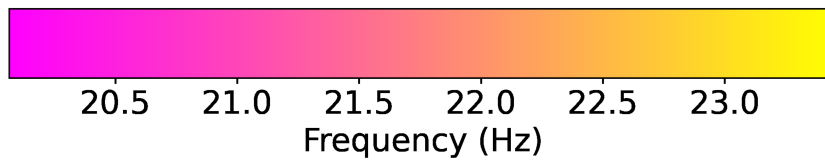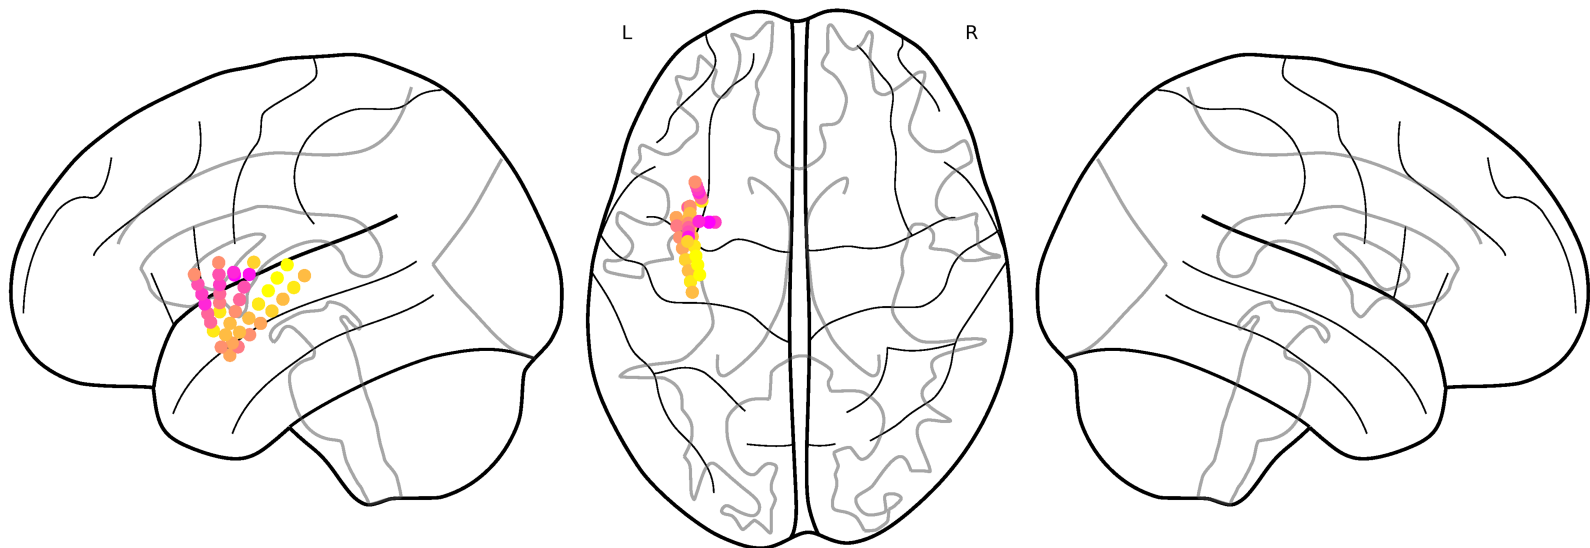

Subject # 3, cluster # 1, cluster frequency = 21.9 Hz, n = 39

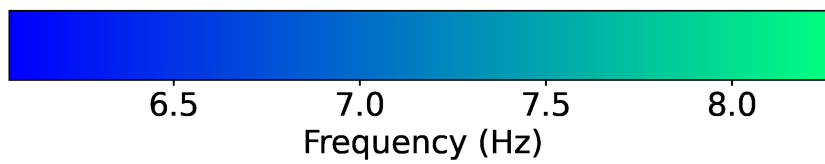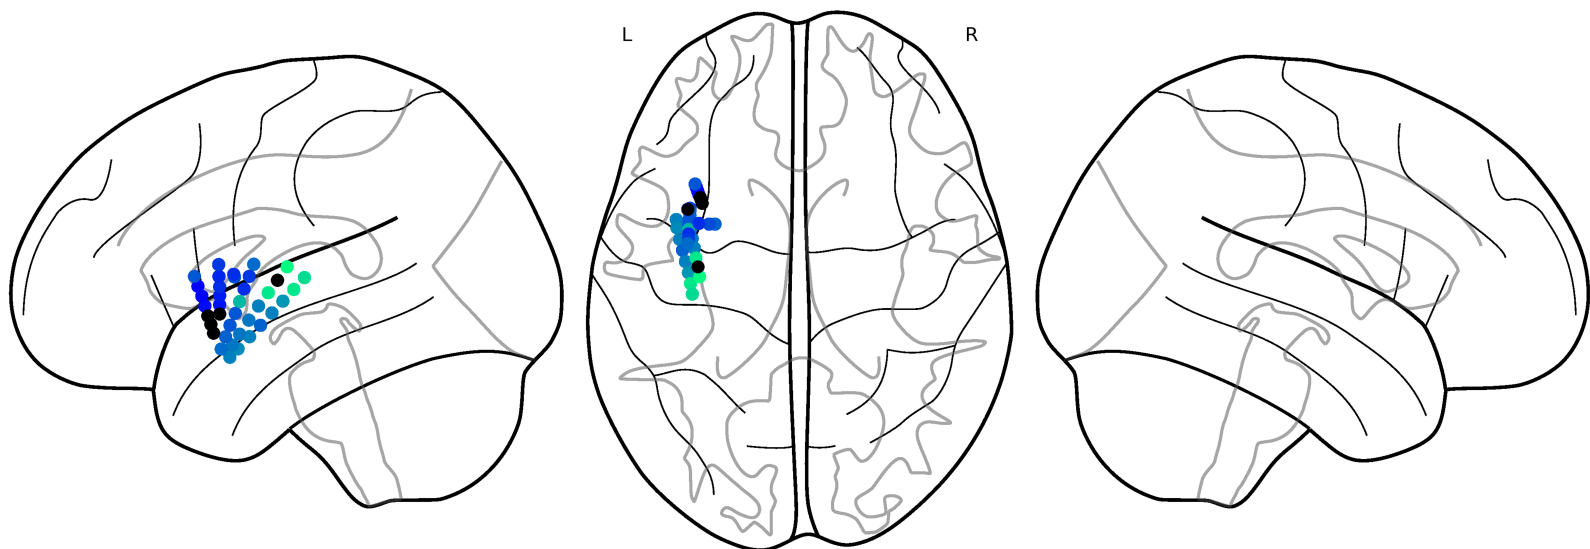

Subject # 3, cluster # 2, cluster frequency = 6.9 Hz, n = 34

Supplement: supp [file elife_poa_e76702_Figure_4_figure_supplement_3.pdf › elife_poa_e76702_Figure_4_figure_supplement_3.pdf]

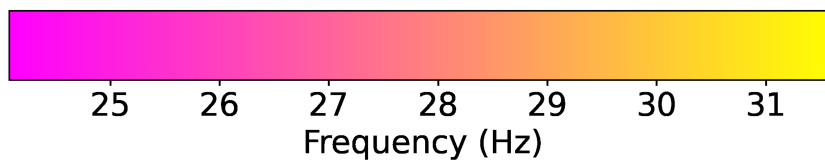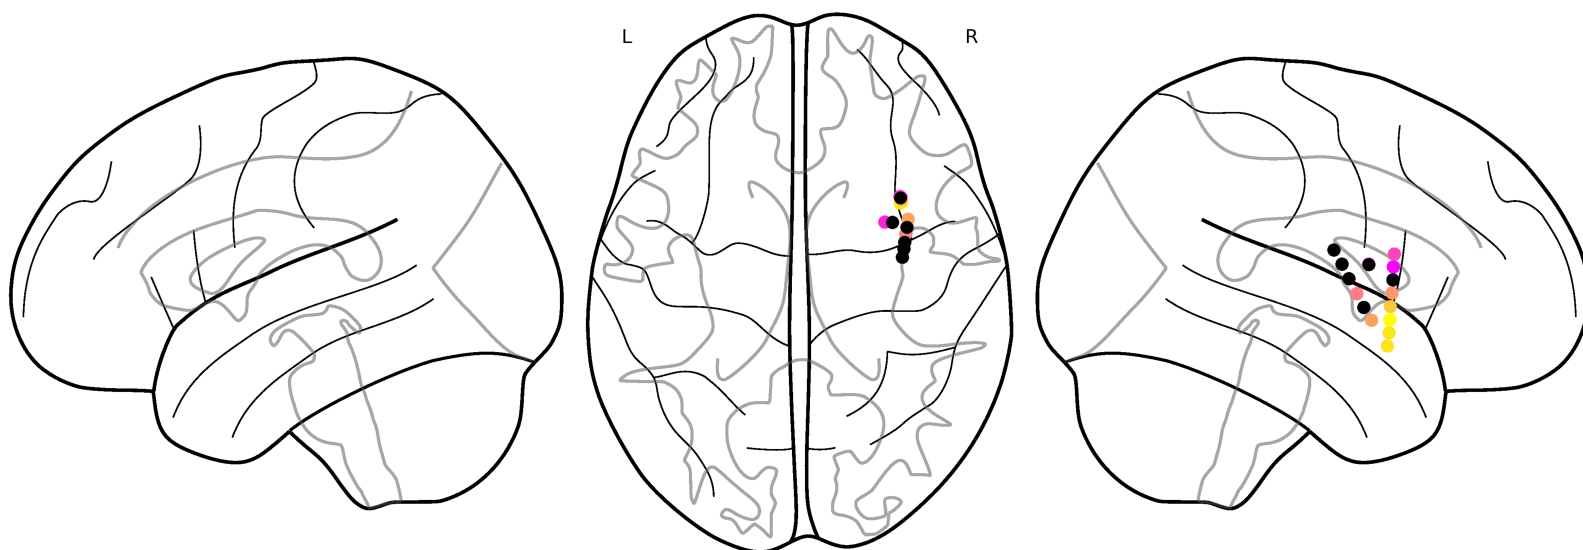

Subject # 5, cluster # 1, cluster frequency = 28.3 Hz, n = 10

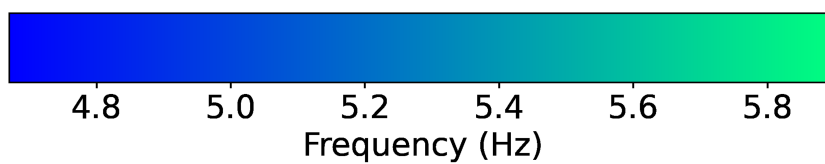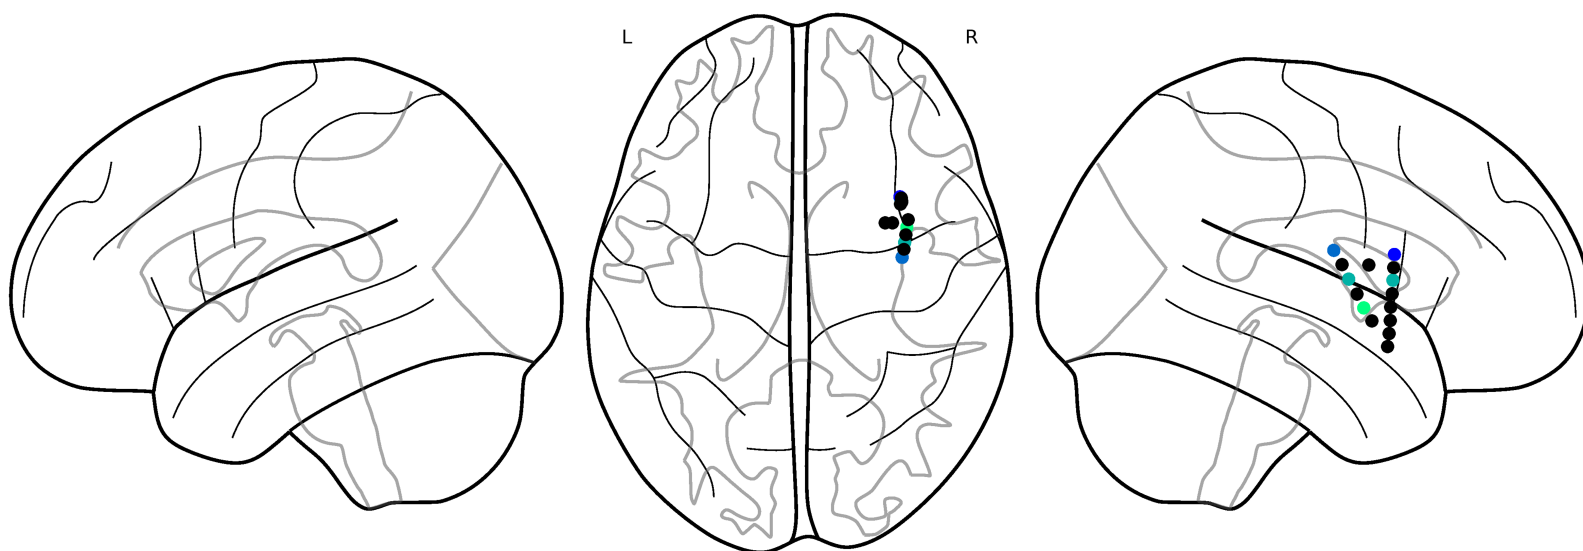

Subject # 5, cluster # 2, cluster frequency = 5.3 Hz, n = 5

Supplement: supp [file elife_poa_e76702_Figure_4_figure_supplement_4.pdf › elife_poa_e76702_Figure_4_figure_supplement_4.pdf]

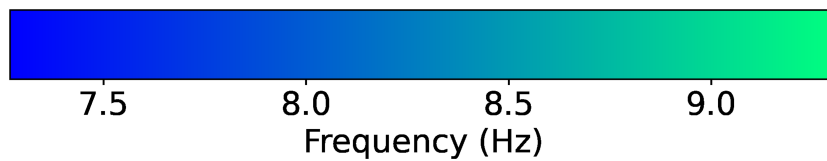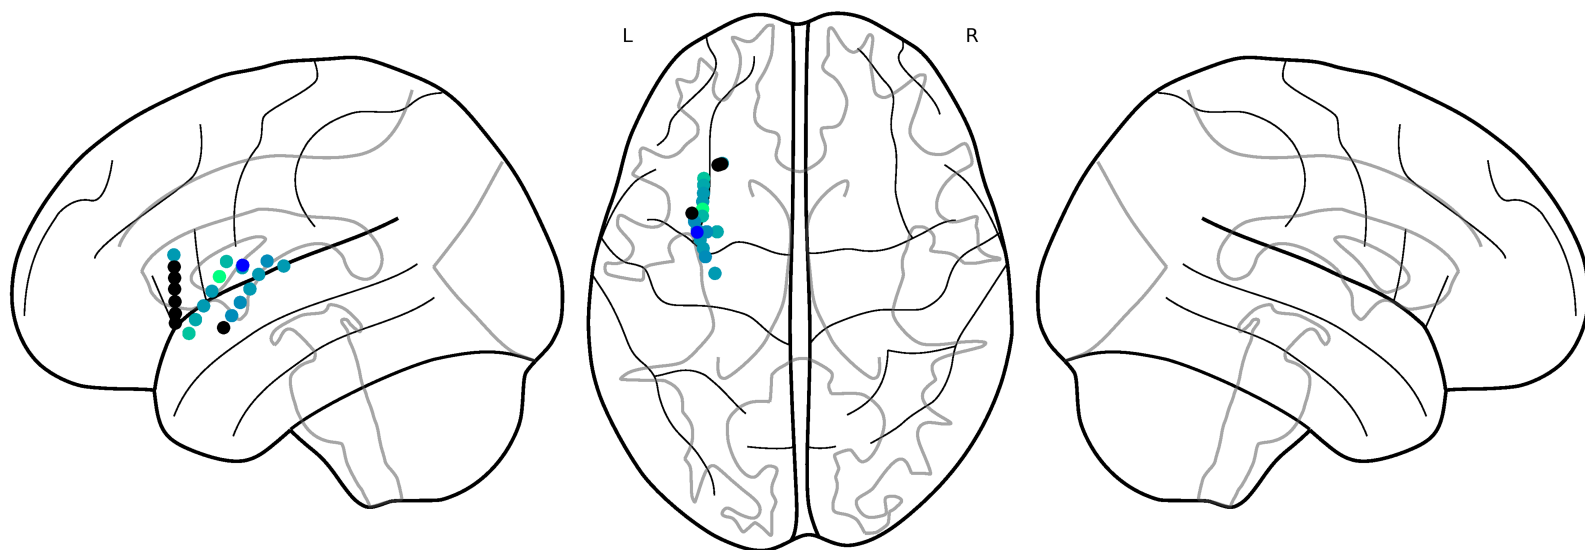

Subject # 7, cluster # 1, cluster frequency = 8.4 Hz, n = 16

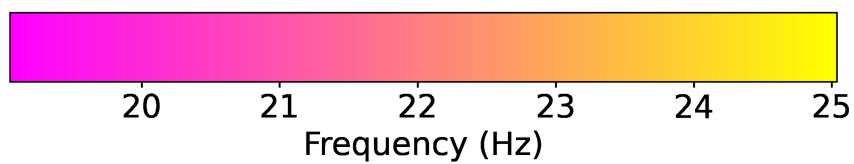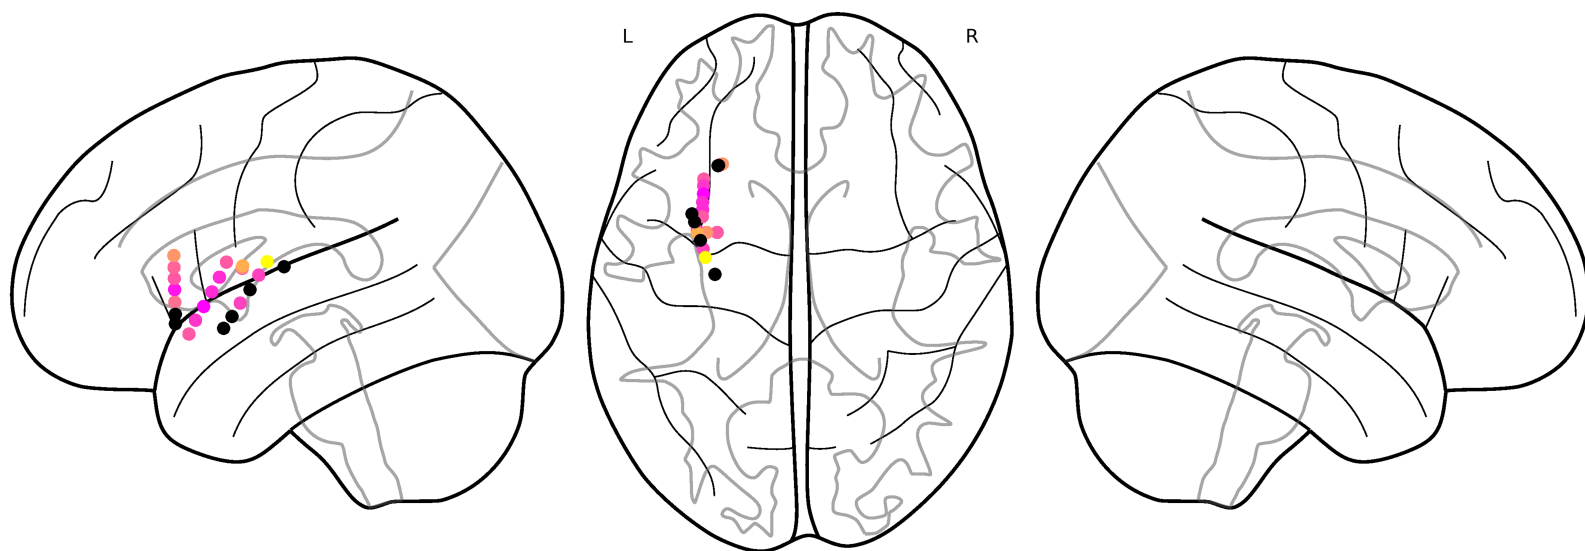

Subject # 7, cluster # 2, cluster frequency = 21.2 Hz, n = 17

Supplement: supp [file elife_poa_e76702_Figure_4_figure_supplement_6.pdf › elife_poa_e76702_Figure_4_figure_supplement_6.pdf]
